# Supplementary material for: S100 genes drive metastasis in salivary gland carcinoma
Source: Research Square preprint supplement (doi:10.21203/rs.3.rs-6868185/v1), 2025-07-22
Supplement: Supplementary file 1 [file 932e38cab4252ae9491f568b.docx]

Title: ***S100* gene**s **drive metastasis in salivary gland carcinoma**

Supplementary Material

Supplementary Table 1. Patient and tumor characteristics for genomic analysis

|  |  |  | SDC | % | ACC | % | p-value |
| --- | --- | --- | --- | --- | --- | --- | --- |
|  |  |  | (N = 26) |  | (N = 9) |  |  |
| Age (years) |  |  |  |  |  |  | 0.0186 |
|  | Median |  | 66 |  | 48 |  |  |
|  | Interquartile range |  | 62-71 |  | 44-55 |  |  |
| M:F | M |  | 20 | 76.9 | 5 | 55.6 | 0.393 |
|  | F |  | 6 | 23.1 | 4 | 44.4 |  |
| Tumor stage |  |  |  |  |  |  |  |
| T status | T1 |  | 6 | 23.1 | 2 | 22.2 | 0.582 |
|  | T2 |  | 13 | 50.0 | 3 | 33.3 |  |
|  | T3 |  | 2 | 7.7 | 2 | 22.2 |  |
|  | T4 |  | 5 | 19.2 | 2 | 22.2 |  |
| N status | N0 |  | 15 | 57.7 | 7 | 77.8 | 0.289 |
|  | N1 |  | 1 | 3.8 | 0 | 0 |  |
|  | N2 |  | 9 | 34.6 | 2 | 22.2 |  |
|  | N3 |  | 1 | 3.8 | 0 | 0 |  |
| M status | M0 (all) | | | | | | |
| Treatments | Surgery with radiation (all) | | | | | | |
| Outcomes |  |  |  |  |  |  | 0.195 |
|  | Death due to disease |  | 10 | 38.5 | 1 | 11.1 |  |
|  | Alive |  | 15 | 57.7 | 8 | 88.9 |  |
|  | FU loss |  | 1 | 3.8 |  |  |  |

SDC: Salivary duct carcinoma,

ACC: Adenoid cystic carcinoma,

FU: Follow-up.

Supplementary Table 2. Primer sequence

| S100 protein PCR primer sets | | | | | | |
| --- | --- | --- | --- | --- | --- | --- |
|  | Human | | size (bp) | Mouse | | size (bp) |
| hS100A4 | Forward | CCTGGATGTGATGGTGTCCA | 199 | mS100A4 | ATGGCAAGACCCTTGGAGG | 200 |
| Reverse | CTCTTGGAAGTCCACCTCGT | TCCCTGTTGCTGTCCAAGTT |
| hS100A7 | Forward | ATGAGCAACACTCAAGCTGAG | 179 | mS100A7 | GATAGTGTGCCTCGCTTCATG | 200 |
| Reverse | TCAAAGACATCGGCGAGGTA | AGGCTGTGCTCAGTACAGTAG |
| hS100A8 | Forward | ACGTCTACCACAAGTACTCCC | 201 | mS100A8 | AGGAAATCACCATGCCCTCT | 180 |
| Reverse | CCACGCCCATCTTTATCACC | TGAGATGCCACACCCACTT |
| hS100A9 | Forward | ATGACTTGCAAAATGTCGCAG | 200 | mS100A9 | ATGGCCAACAAAGCACCTTC | 202 |
| Reverse | TCCAGGTCCTCCATGATGTG | CCAGGTCCTCCATGATGTCA |
| hS100B | Forward | ATGTCTGAGCTGGAGAAGGC | 199 | mS100B | ATGTCCGAGCTGGAGAAGG | 198 |
| Reverse | CGTCTCCATCATTGTCCAGTG | ATCCCCATCTTCGTCCAGC |
| hS100P | Forward | CCATGGGCATGATCATAGACG | 201 |  | | |
| Reverse | ACTCACTGAAGTCCACCTGG |

Supplementary Table 3. shRNA sequence

| Table 3. Sequence for shRNA | |
| --- | --- |
| Target | |
| S100A4 | GCUCAACAAGUCAGAACUAAA |
| S100A8 | CCACAAGTACTCCCTGATAAA |
| S100A9 | AGAGACCATCATCAACACCTT |

Supplementary Table 4.

Antibody information for Western blot and immunofluorescence assay

| **Antibody** | **Host** | **Company** | **Cat. no.** |
| --- | --- | --- | --- |
| S100A4 | Rabbit mAb | Cell signaling | 13018 |
| S100A7 | Mouse mAb | Novus | 47c1068 |
| S100A8 | Mouse mAb | abcam | 178577 |
| S100A9 | Rabbit | Novus | NB110-89726 |
| S100B | Rabbit mAb | Cell signaling | 9550 |
| S100P | Rabbit | Cell signaling | 7677 |
| Alexa Fluor 488 | Mouse | Thermo scientific | A11001 |
| Cy3 | Rabbit | Thermo scientific | A10520 |
| β-actin | Mouse | Sigma-aldrich | A5441 |
